# Supplementary material
Source: PubMed Central journal article supplement (PMC5766957)
Supplement: 10.1074_M117.812685_jbc.M117.812685-1.pdf [file 10.1074_M117.812685_jbc.M117.812685-1.pdf]

Supplemental Information

**Structure and monomer/dimer equilibrium for the guanylyl cyclase domain of the optogenetics protein RhoGC**

Ramasamy P. Kumar<sup>†</sup>, Benjamin R. Morehouse<sup>†</sup>, Josiane Fofana, Melissa M. Trieu, Daniel H. Zhou, Molly O. Lorenz, and Daniel D. Oprian<sup>\*</sup>

Department of Biochemistry, Brandeis University, Waltham, MA 02454

**Author Information**

<sup>†</sup> These authors contributed equally to this work

**Corresponding Author**

<sup>\*</sup>Department of Biochemistry, Brandeis University, 415 South St., Waltham, MA 02454. Telephone: 781-736-2322. Fax: 781-736-8487. E-mail: [oprian@brandeis.edu](mailto:oprian@brandeis.edu).

**Running title**

Structure and monomer/dimer equilibrium of guanylyl cyclase

---

**Table of Contents**

**Figure S1.** Sequence alignment of guanylyl cyclases.

**Figure S2.** Enzyme activity as a function of substrate concentration.

**Figure S3.** Dependence of guanylyl cyclase activity on enzyme concentration.

**Figure S4.** Structural superposition of the *B. emersonii* GC<sub>Rho</sub> monomer and mammalian AC

**References**

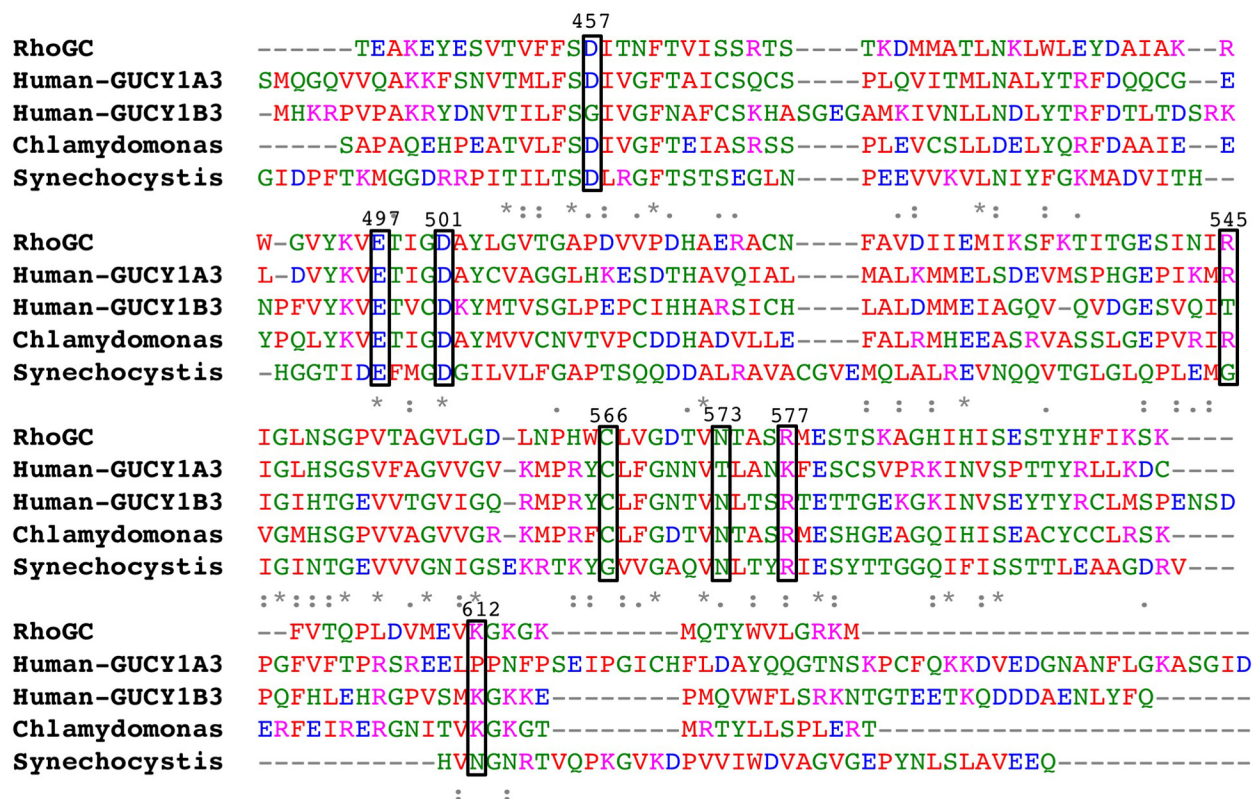

**Figure S1. Sequence alignment of guanylyl cyclase catalytic domains from proteins with annotated crystal structures.** Sequence comparison of guanylyl cyclase domains from *B. emersonii*, human, *C. reinhardtii*, and *Synechocystis* PCC6803. The multiple sequence alignment was generated using Clustal Omega(1). Conserved amino acid residues involved in catalysis are boxed and numbered according to RhoGC, the guanylyl cyclase domain from *B. emersonii* as reference.

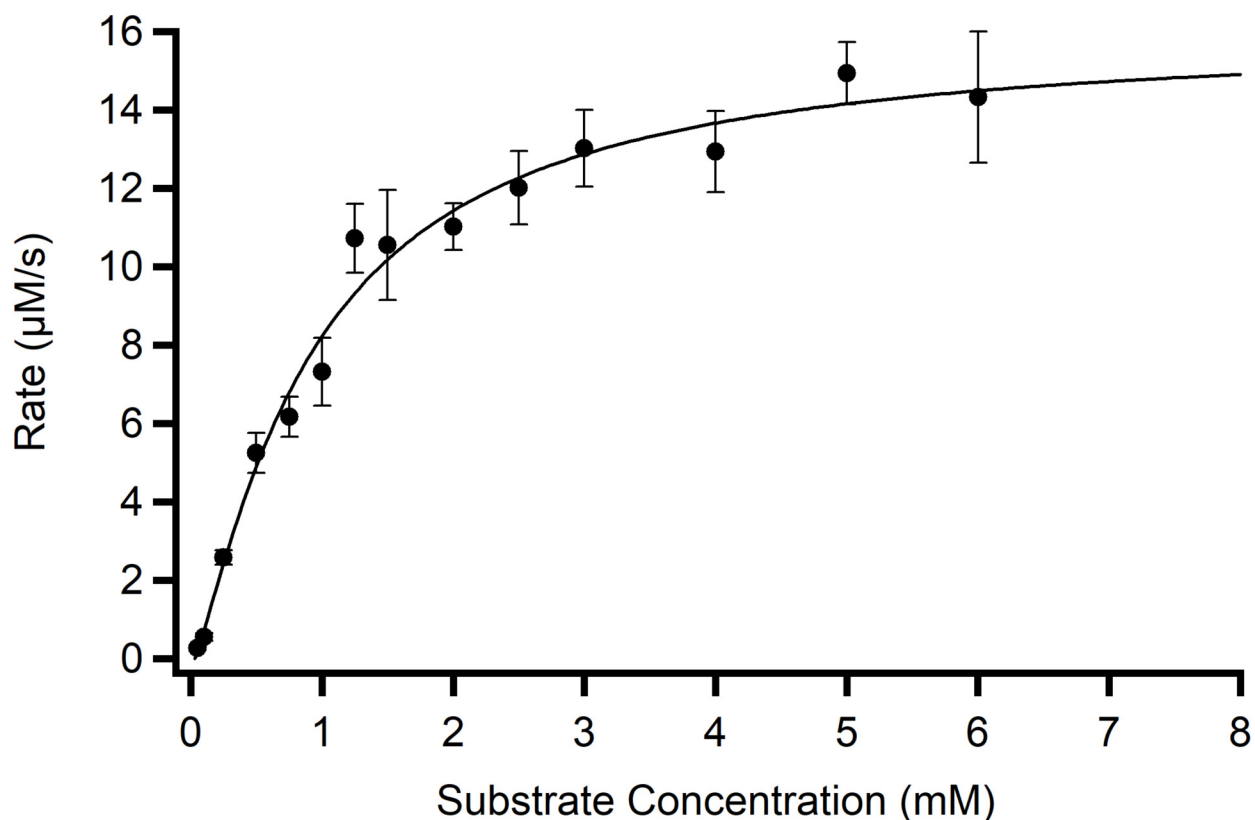

**Figure S2.** Enzyme activity as a function of substrate concentration. The concentration of GTP was varied while enzyme ( $[GC_{Rho}] = 10 \mu\text{M}$ ) and metal ion ( $[Mn^{2+}] = 10 \text{mM}$ ) concentrations were fixed. The data (solid circles) were fit to the equation  $Rate = \frac{V_{max}(S)^n}{(S_{0.5})^n + S^n}$  (solid line) where  $V_{max}$  is the maximum velocity,  $S$  is the concentration of GTP,  $S_{0.5}$  is the substrate concentration where the  $Rate = V_{max}/2$ , and  $n$  is the Hill coefficient:  $S_{0.5} = 0.9 \pm 0.1 \text{mM}$ ,  $V_{max} = 16 \pm 1 \mu\text{M/s}$ , and  $n = 1.2 \pm 0.3$ . While it is not possible to confidently distinguish cooperative from non-cooperative rate behavior with these data, a Hill-type equation was used here for consistency with other guanylyl cyclases.(2)

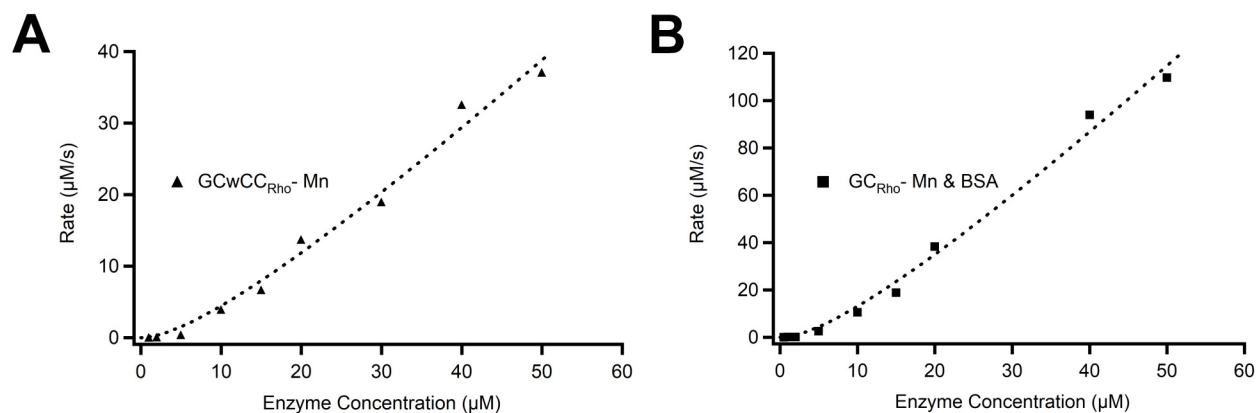

**Figure S3. Dependence of guanylyl cyclase activity on enzyme concentration.** *A*, Data for GCwCC<sub>Rho</sub><sup>-</sup>Mn from Figure 8*A*, replotted on an expanded scale to more clearly illustrate non-linear dependence of activity on enzyme concentration. *B*, Control experiment showing that non-linear dependence of activity on enzyme concentration is not a consequence of non-specific protein interactions. The conditions of this experiment were identical to those in Figure 8*A* except that the total protein concentration was maintained at 50 μM using bovine serum albumin (BSA) to compensate for decreasing concentrations of GC<sub>Rho</sub><sup>-</sup>. The same non-linear dependence of activity on enzyme concentration was observed in this experiment as was found in the absence of BSA, clearly showing that the non-linear behavior does not result from non-specific protein interactions. The dotted curve is a fit of the data to equation 1 with  $K_D = 49 \pm 30 \mu\text{M}$  and  $k_{\text{cat}} = 13 \pm 3 \text{ s}^{-1}$ .

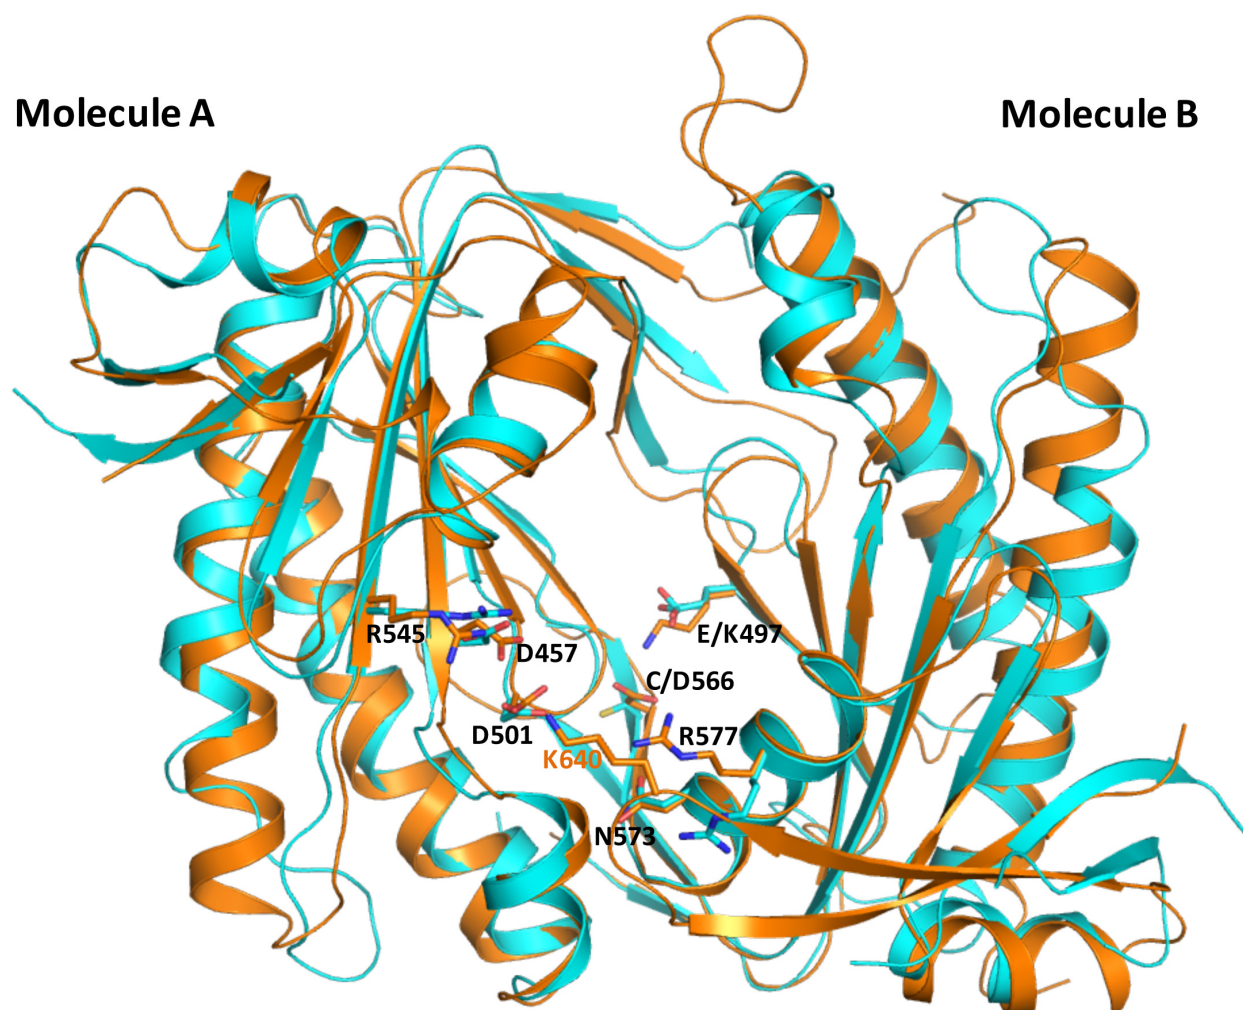

**Figure S4.** Structural superposition of the *B. emersonii* GC<sub>Rho</sub> monomer with the crystal structure of the mammalian AC (PDB entry 1CJU) complex with substrate analog ddATP showing the location of conserved catalytic residues. GC<sub>Rho</sub> molecule A was superposed on the mammalian AC molecule A. GC<sub>Rho</sub> molecule B was duplicated from A and superposed on mammalian AC molecule B. Cartoon representation of GC<sub>Rho</sub> and mammalian AC molecules are colored in cyan and salmon, respectively. Active site residues are shown as sticks. Active site residues for GC<sub>Rho</sub> and AC are identified before and after the slash, respectively. Only one of the two symmetry-related active sites in the structure is shown for clarity.

**REFERENCES**

1. McWilliam, H., Li, W., Uludag, M., Squizzato, S., Park, Y. M., Buso, N., Cowley, A. P., and Lopez, R. (2013) Analysis Tool Web Services from the EMBL-EBI. *Nucleic Acids Res.* **41**, W597-600.
2. Winger, J. A., Derbyshire, E. R., Lamers, M. H., Marletta, M. A., and Kuriyan, J. (2008) The crystal structure of the catalytic domain of a eukaryotic guanylate cyclase. *BMC Struct. Biol.* **8**, 42
